# Supplementary material
Source: PubMed Central journal article supplement (PMC8139242)

# Figure S5

## MSLN protein sequence

**A**

(NM\_001177355.2 → NP\_001170826.1 **Mesothelin isoform 1 preproprotein**)

MALPTARPLLGSCGTPALGSLFLFLFSLGWVQPSRTLGETGQEAAPLDGVLNPPNISSLSPRQLLGFP  
 CAEVSLSTERVRELAVALAQKNVKLSTEQLRCLAHRLSEPPED**LDALPLDLLL**FLNPDAFSGPQACTRF  
 FSRITKANVDLLPRGAPERQRLLPALACWGVRSLLSEADVRALLGGLACDLPGRFVAESAEVLLPRLVS  
 CPGPLDQDQEAARAALQGGGPPYGPSTWSVSTMDALR**GLLPVL**GQPIIRSIPQGVIAAWRQRSSRDP  
 SWRQPRTLRRPRFRREVEKTCPSGKKAREIDESLIFYKKWELEACVDAALLATQMDRVNAIPFTYEQLD  
 VLKHKLDELYPQGYPE**SVIQHLGLY**LFLKMSPEDIRKWNVTSLETLKALLEVNKGHEMSPQVATLIDRFVK  
 GRGQLDKDTLDTLTAFYGYLCSLSPEELSSVPPSSIWAVRPQDLTDCDPRQLDVLYPKARLAFQNMNG  
 SEYFVKIQSFLGGAPTEDLKALSQQNVSMDLATFMKLRDVAVPLPTVAEVQKLLGPHVEGLKAEERHRPV  
 RDWILRQRQDDDLTGLGLQGGINPYLVLDLSMQEALSGTPCLLGGPVLTVLALLLASTLA

## Putative miRNA-198 binding sites

### Location of Y318

**B**

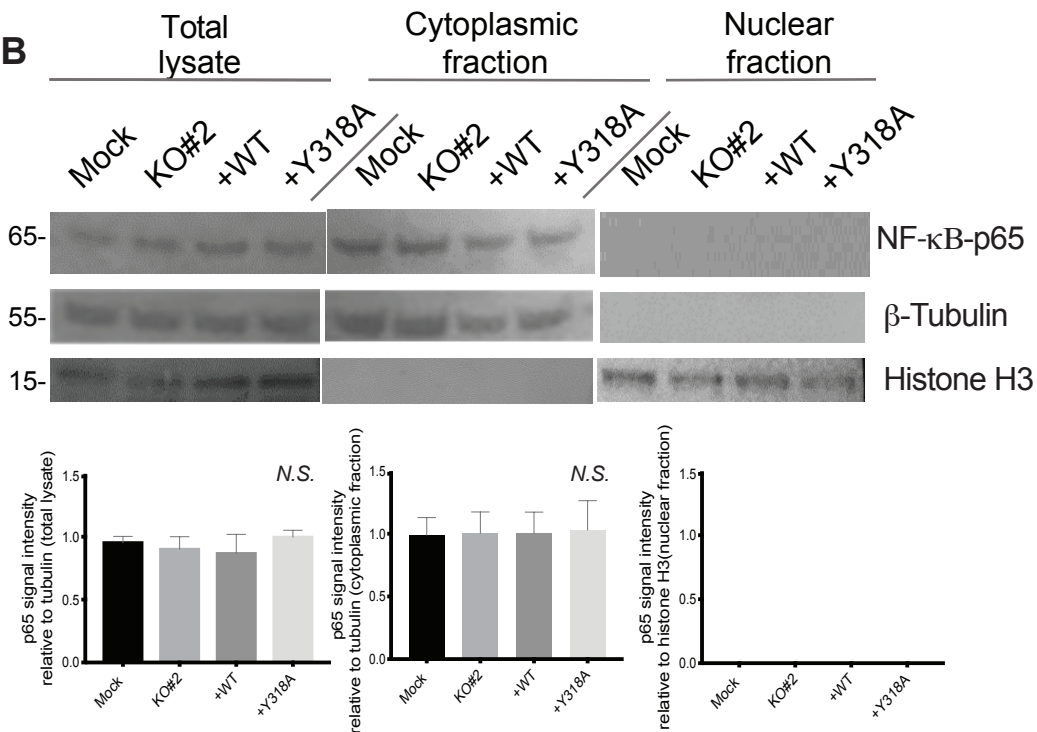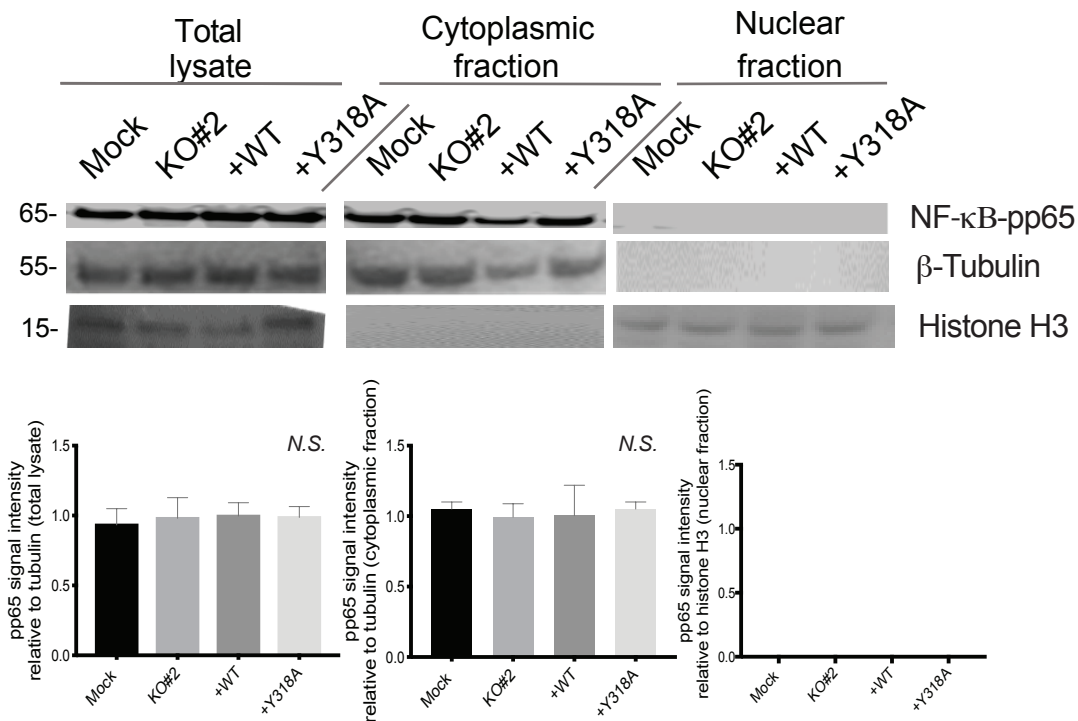

Supplement: NIHMS1693285-supplement-Supple_fig_5.pdf [file NIHMS1693285-supplement-Supple_fig_5.pdf]
