# Supplementary material
Source: PubMed Central journal article supplement (PMC8139242)

**Figure S1**

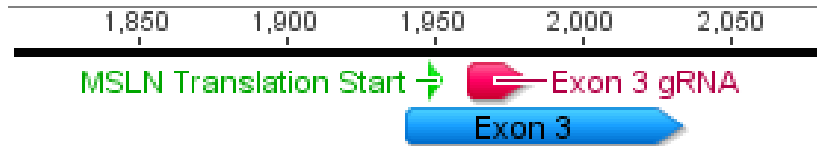

Supplement: NIHMS1693285-supplement-Supple_fig_1.pdf [file NIHMS1693285-supplement-Supple_fig_1.pdf]

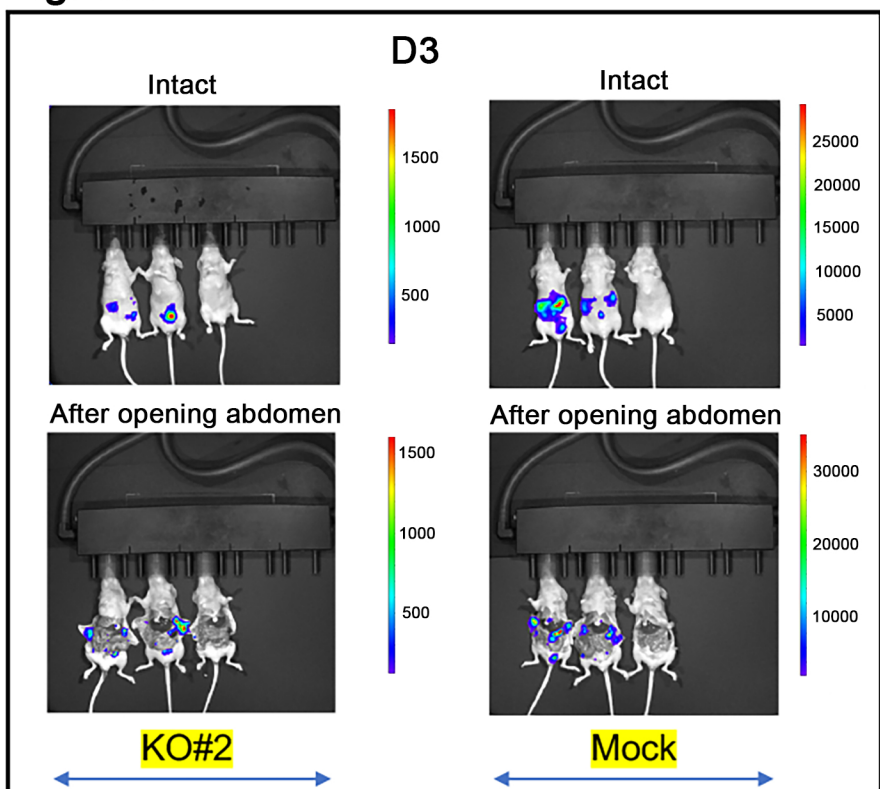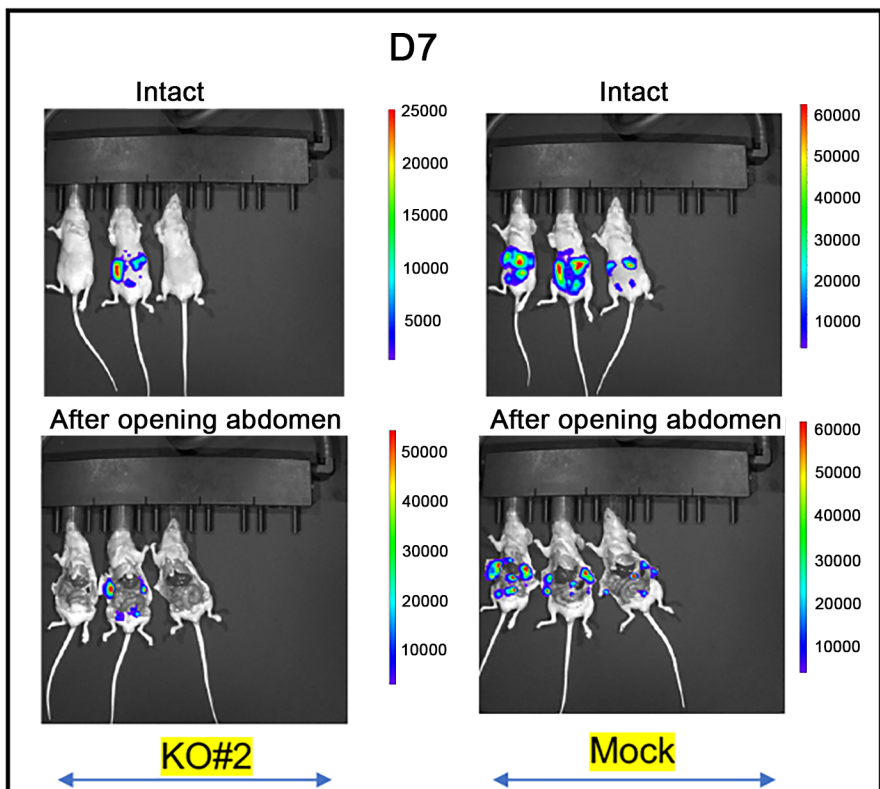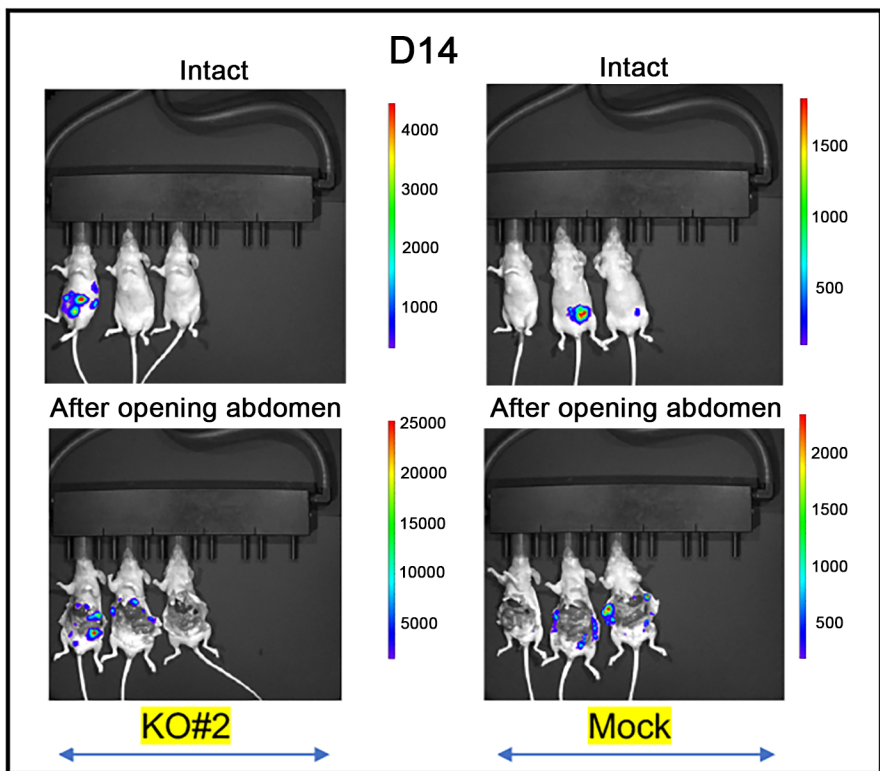

Supplement: NIHMS1693285-supplement-Supple_fig_2.pdf [file NIHMS1693285-supplement-Supple_fig_2.pdf]

**Figure S3***in vitro*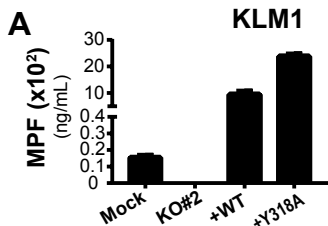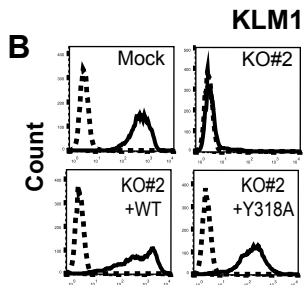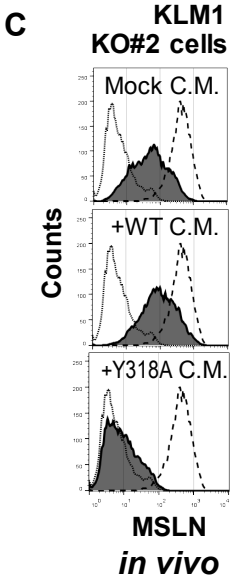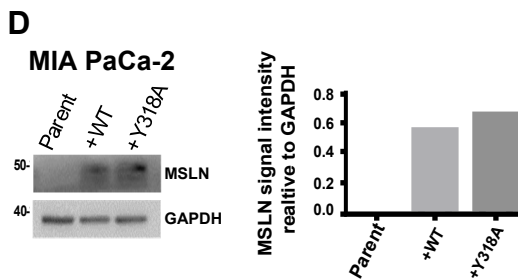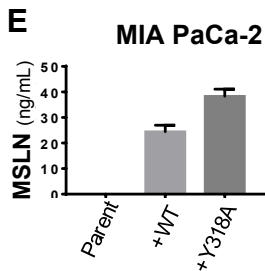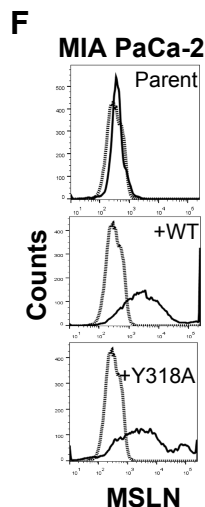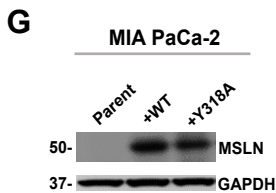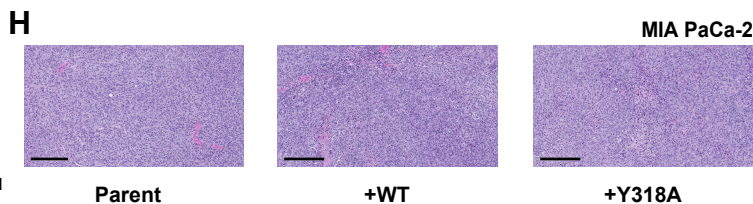

Supplement: NIHMS1693285-supplement-Supple_fig_3.pdf [file NIHMS1693285-supplement-Supple_fig_3.pdf]

Figure S4

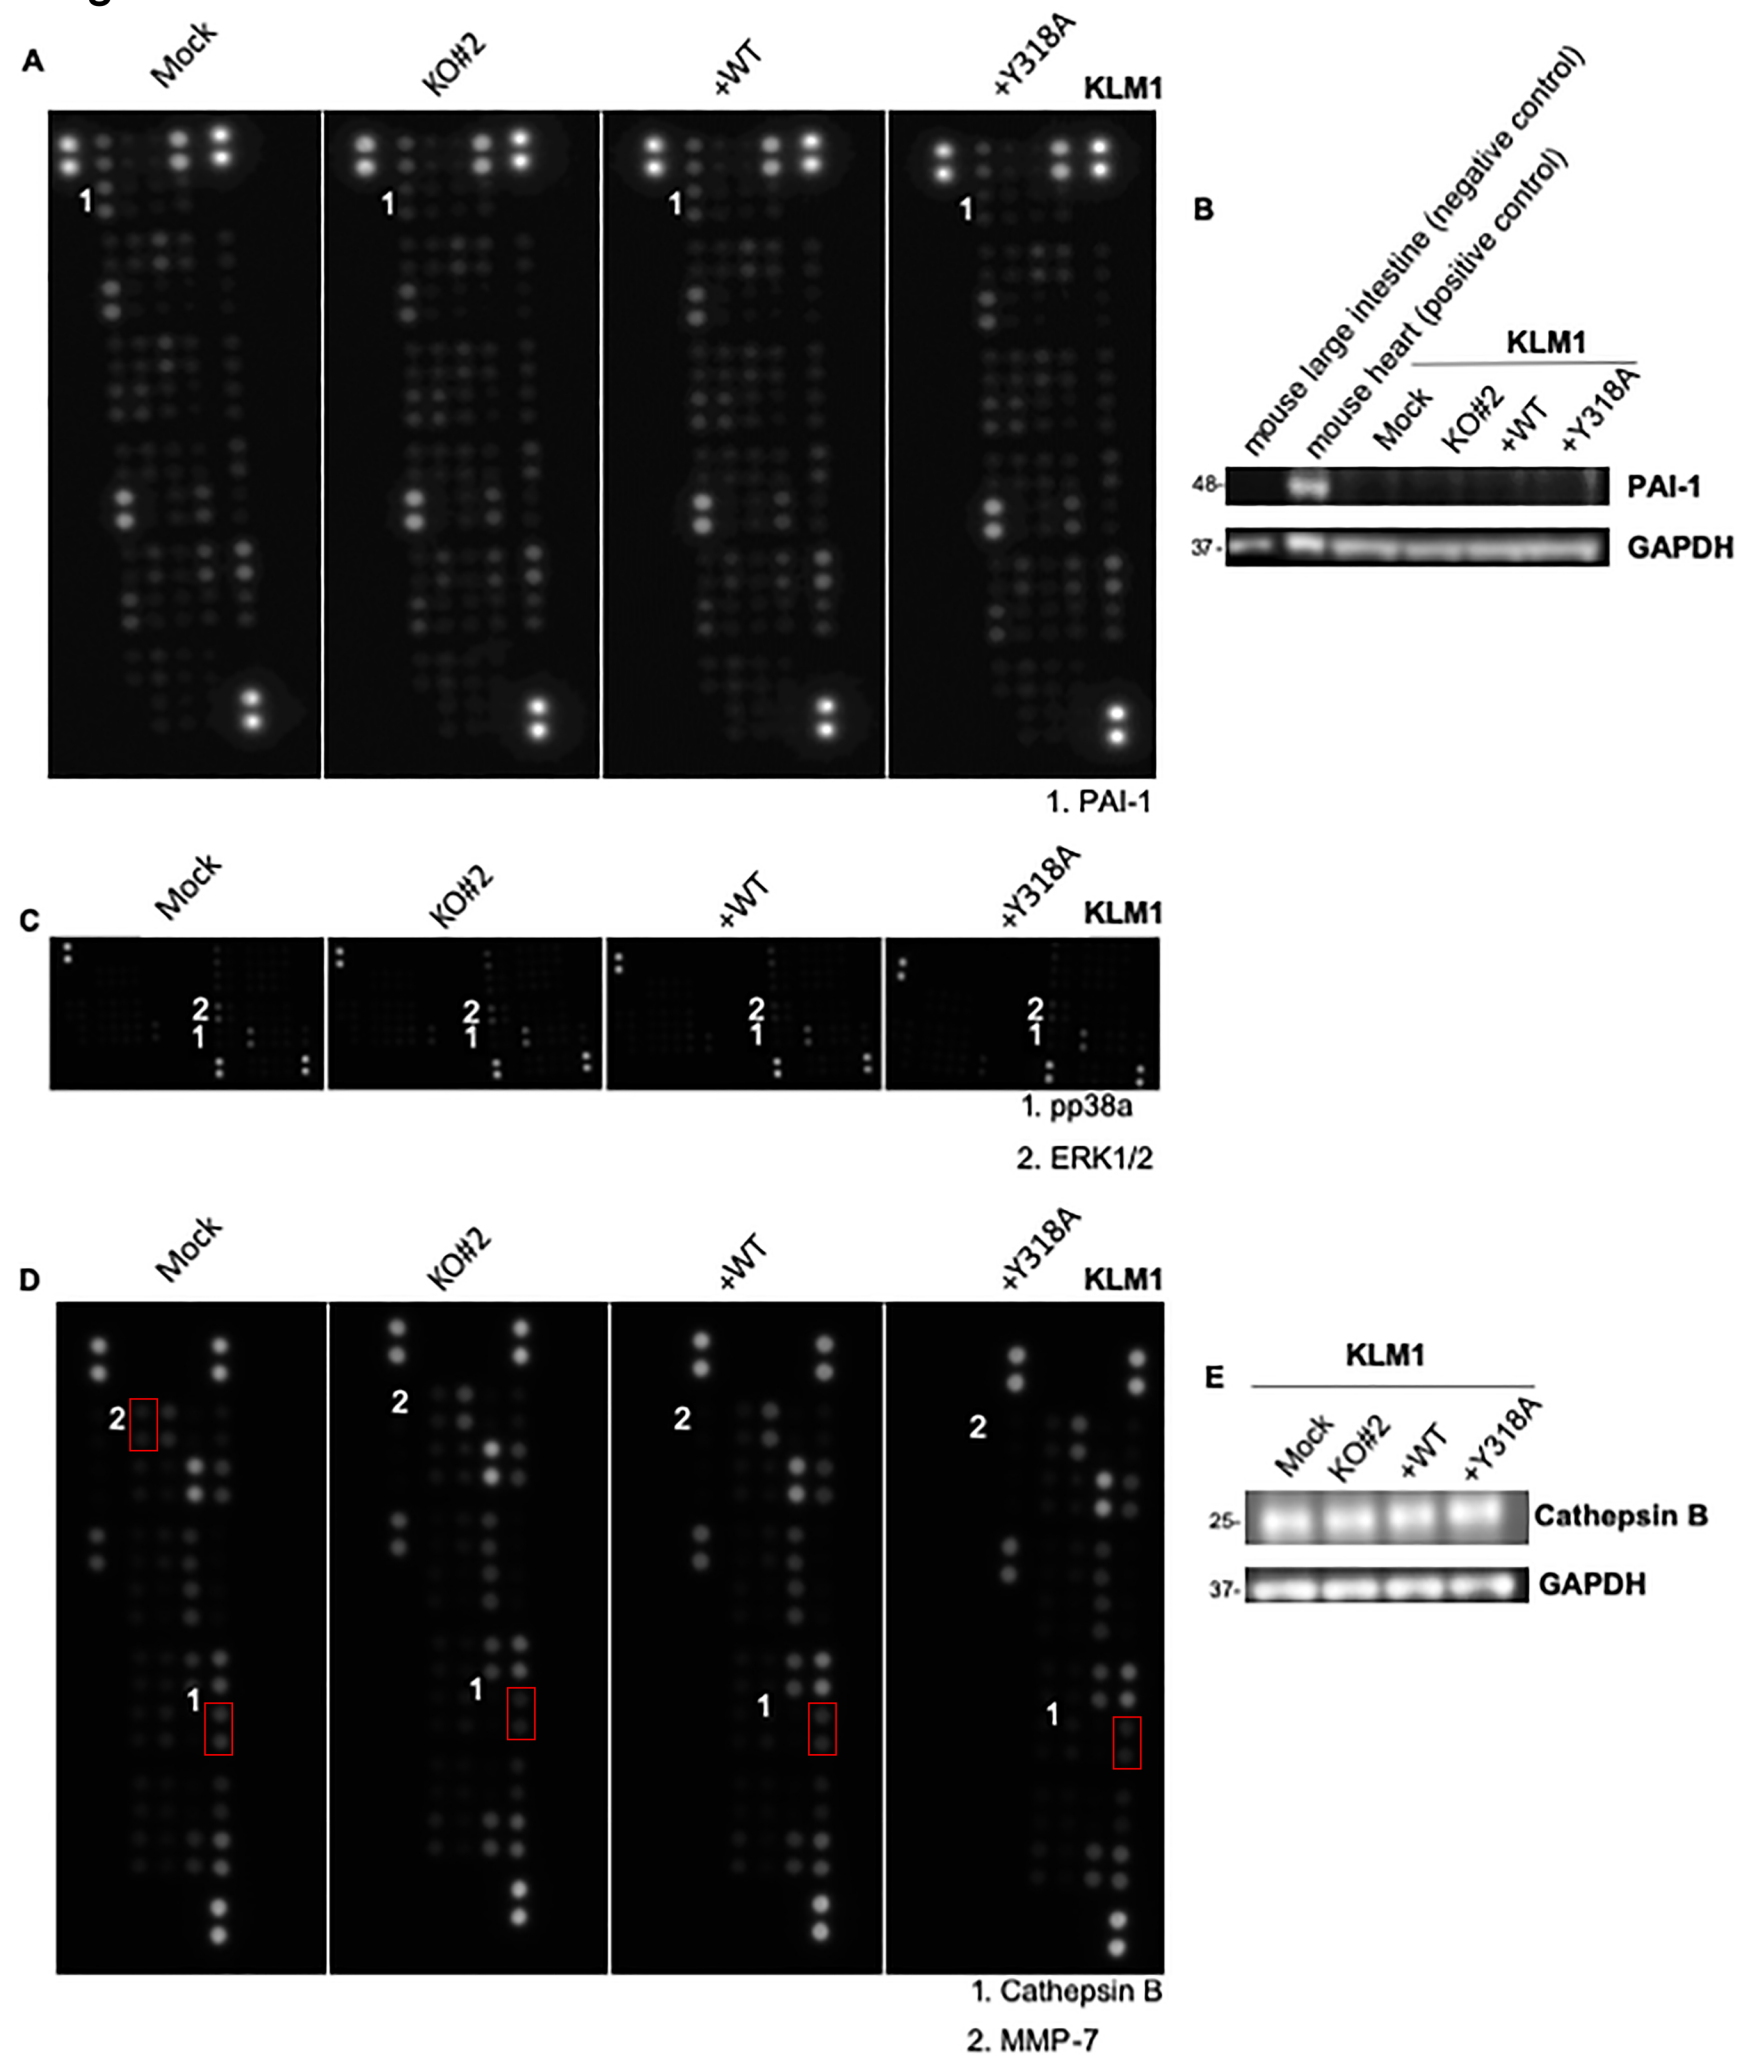

Supplement: NIHMS1693285-supplement-Supple_fig_4.pdf [file NIHMS1693285-supplement-Supple_fig_4.pdf]

# Figure S6

**A**

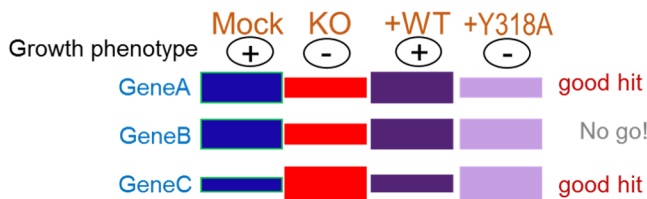

**B**

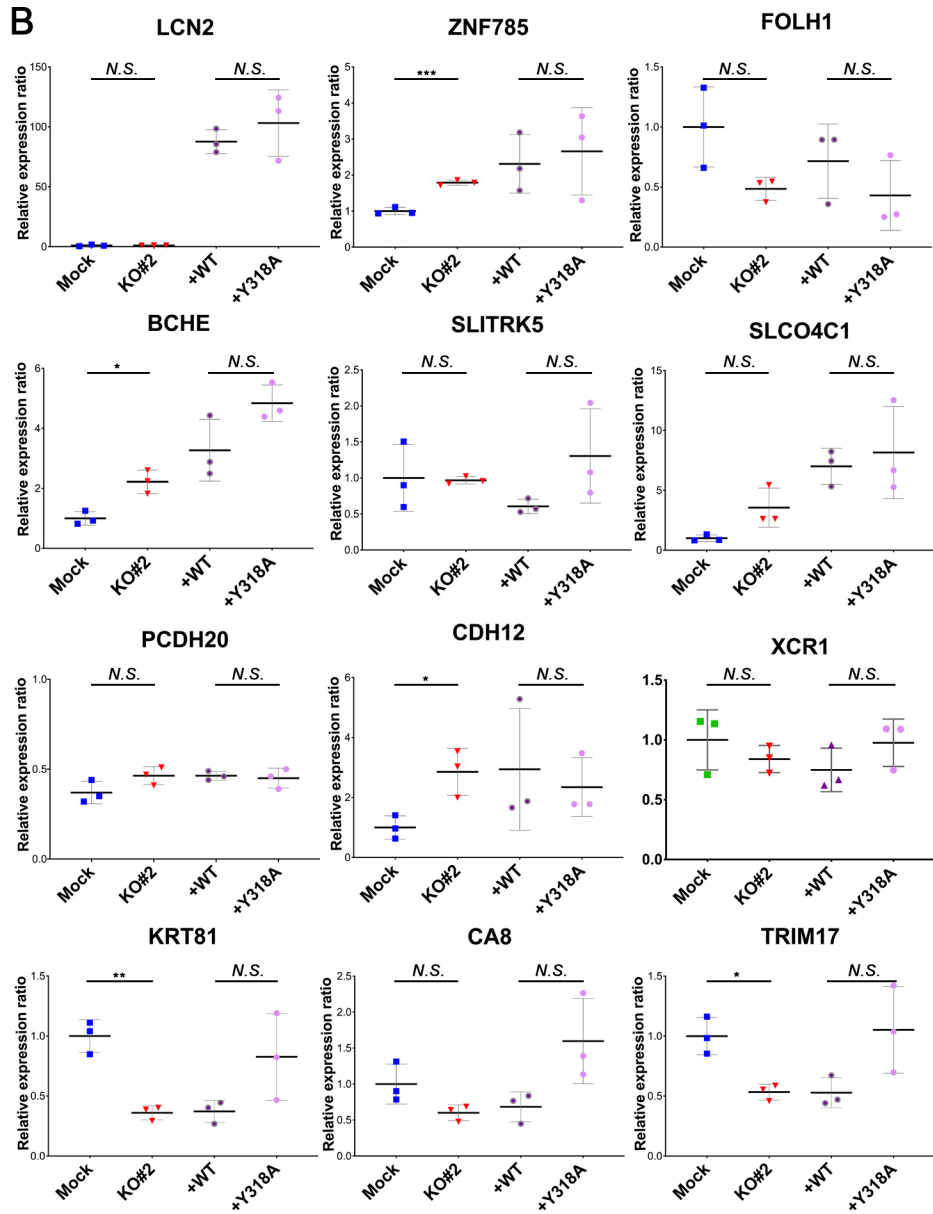

Supplement: NIHMS1693285-supplement-Supple_fig_6.pdf [file NIHMS1693285-supplement-Supple_fig_6.pdf]
